# Supplementary material for: Bioelectrical redox cycling of anthraquinone-2,6-disulfonate coupled to perchlorate reduction
Source: Royal Society of Chemistry journal article supplement (doi:10.1039/c2ee21594b), 2012-01-01
Supplement: c2ee21594b.xlsx [file c2ee21594b.xlsx]

## Sheet: Data
Table S2. Complete proteomics dataset.
	10 mM perchlorate,10 mM acetate, 4 mM AHDS, lysed						10 mM perchlorate, 10 mM acetate, lysed				16 mM nitrate, 10 mM acetate, 4 mM AHDS, lysed				16 mM nitrate, 10 mM acetate, lysed					10 mM perchlorate,10 mM acetate, 4 mM AHDS, trypsin shaved						10 mM perchlorate,10 mM acetate, trypsin shaved				16 mM nitrate, 10 mM acetate, 4 mM AHDS, trypsin shaved			16 mM nitrate, 10 mM acetate, trypsin shaved
locus_tag	rep 1	rep 2	rep 3	rep 4	rep 5	rep 6	rep 1	rep 2	rep 3	rep 4	rep 1	rep 2	rep 3	rep 4	rep 1	rep 2	rep 3	rep 4	rep 5	rep 1	rep 2	rep 3	rep 4	rep 5	rep 6	rep 1	rep 2	rep 3	rep 4	rep 1	rep 2	rep 3	rep 1	rep 2	rep 3
Dsui_0004	0	0	0	0	0	0	0	0	0	0	1	0	0	0	0	0	0	0	0	0	0	0	0	0	0	0	0	0	0	0	1	1	0	0	0
Dsui_0007	1	1	1	1	1	3	2	0	1	3	0	0	1	1	0	0	1	1	2	1	1	1	1	0	1	1	1	1	1	0	1	1	2	1	1
Dsui_0011	3	4	2	8	2	2	2	2	3	2	4	12	2	2	4	5	1	3	4	7	5	4	3	4	4	8	9	4	2	1	4	6	2	1	2
Dsui_0019	1	1	3	1	0	1	0	0	0	0	0	6	1	2	0	1	0	0	0	2	2	2	2	0	0	0	0	0	2	0	5	2	1	0	1
Dsui_0038	0	0	0	0	0	0	0	0	0	0	0	0	2	1	0	0	0	0	0	0	0	0	0	0	0	0	0	0	0	0	1	0	0	0	0
Dsui_0045	0	0	0	0	0	0	0	0	0	0	0	0	0	0	0	0	0	0	0	1	0	0	0	0	0	0	0	0	0	0	0	0	0	0	0
Dsui_0048	0	2	0	0	0	0	0	0	0	0	0	0	0	1	0	0	0	0	0	0	0	0	0	0	0	0	2	0	0	0	0	0	0	0	0
Dsui_0050	0	1	0	0	1	1	1	0	1	0	0	0	0	0	0	0	0	0	0	0	0	1	1	0	0	0	0	0	0	0	1	1	0	0	0
Dsui_0052	0	0	0	0	0	0	0	0	0	0	0	1	0	0	0	0	0	0	0	0	0	0	0	0	0	0	0	0	0	0	0	0	0	0	0
Dsui_0079	0	0	0	0	0	0	1	0	0	0	0	0	0	0	0	0	0	0	0	0	0	0	0	0	0	0	0	0	0	0	0	0	0	0	0
Dsui_0081	0	1	0	0	0	0	0	0	0	0	0	0	1	0	0	0	0	0	0	0	0	0	0	0	0	0	0	0	0	0	0	0	0	0	0
Dsui_0085	0	1	0	0	0	0	0	0	0	0	0	0	0	0	0	0	0	0	0	0	1	1	1	0	0	0	1	0	0	0	0	1	0	0	0
Dsui_0093	0	0	0	0	0	0	1	0	0	1	0	0	0	0	0	0	0	0	0	0	0	0	0	0	0	0	0	0	0	0	0	0	0	0	0
Dsui_0096	0	0	0	0	0	0	0	0	0	0	0	0	0	2	0	0	0	0	0	0	0	0	0	0	0	0	0	0	0	0	0	3	0	0	0
Dsui_0097	0	0	0	0	0	0	0	0	0	0	0	0	0	0	0	0	0	0	0	0	0	0	0	0	0	0	0	0	0	0	0	0	1	1	0
Dsui_0099	0	0	0	0	0	0	0	0	0	0	0	0	0	0	0	0	0	0	0	1	0	0	0	0	0	1	0	0	0	0	0	0	0	0	0
Dsui_0111	1	1	0	0	0	0	3	0	0	0	0	0	0	0	0	0	0	0	0	0	1	0	0	0	0	0	2	0	0	0	0	0	0	0	0
Dsui_0125	0	1	0	0	0	0	0	0	0	0	0	1	0	0	0	0	0	0	0	0	1	0	0	0	0	0	0	0	0	0	0	0	0	0	0
Dsui_0131	0	0	0	0	0	0	0	0	0	0	1	2	0	0	1	1	0	1	1	3	0	0	0	0	0	3	2	0	1	0	0	0	1	0	2
Dsui_0133	1	1	1	1	1	1	2	1	3	1	0	0	1	1	0	0	4	0	1	1	1	1	1	0	0	1	1	0	1	0	1	1	0	1	0
Dsui_0143	11	12	12	8	12	14	3	2	1	8	0	0	0	0	0	0	0	0	0	20	16	21	22	19	19	14	7	16	14	8	3	2	1	0	0
Dsui_0145	18	25	17	19	18	20	18	11	17	17	10	13	10	10	7	1	0	0	0	20	24	22	25	20	21	19	17	21	19	10	19	17	6	4	0
Dsui_0146	2	1	1	0	0	0	1	0	2	0	0	0	0	0	0	0	0	0	0	2	3	1	0	0	0	3	2	1	0	0	0	0	0	0	0
Dsui_0147	0	1	1	0	1	1	0	0	3	0	0	0	0	0	0	0	0	0	0	4	0	3	2	1	2	2	0	5	1	0	0	0	0	0	0
Dsui_0148	8	13	9	14	12	13	6	0	6	3	2	5	1	2	0	0	0	0	0	14	9	14	14	10	12	11	7	11	7	2	5	7	0	0	0
Dsui_0149	17	16	20	13	14	15	6	0	8	5	0	0	0	0	0	0	0	0	0	23	11	29	30	16	25	16	0	20	12	0	2	2	0	0	0
Dsui_0152	0	0	0	0	0	0	0	0	1	0	0	0	0	0	0	0	0	0	0	0	1	0	0	0	0	0	0	0	0	0	0	0	0	0	0
Dsui_0158	0	1	0	0	0	0	1	0	0	0	0	0	0	0	0	0	0	0	0	0	1	0	0	0	0	0	1	0	0	0	0	0	0	0	0
Dsui_0163	0	0	0	0	0	0	0	0	0	0	0	0	0	0	0	0	1	0	0	0	0	1	0	0	0	0	0	0	1	0	0	0	0	0	0
Dsui_0169	0	1	0	0	0	0	0	0	0	0	0	0	0	1	0	0	0	0	0	0	1	0	0	0	0	1	1	0	0	0	1	0	0	0	0
Dsui_0175	0	0	0	0	0	0	0	0	0	0	0	0	0	0	0	0	0	0	0	0	0	0	1	0	0	0	0	0	0	0	0	0	0	0	0
Dsui_0227	0	0	0	0	0	0	0	0	0	0	0	0	0	0	0	1	0	0	0	0	0	0	0	0	0	0	0	0	0	0	0	0	0	0	0
Dsui_0261	2	0	1	0	0	0	0	0	1	0	0	0	0	0	0	0	1	1	0	10	0	1	2	0	0	8	0	1	3	1	4	5	2	5	0
Dsui_0266	0	0	0	0	0	0	0	0	0	0	0	0	0	0	0	0	0	0	0	0	0	0	0	0	0	1	0	0	0	0	0	0	0	0	0
Dsui_0283	15	11	18	9	7	7	1	0	9	0	1	7	9	10	0	0	7	0	0	2	0	0	0	2	4	3	2	0	0	0	0	1	0	0	0
Dsui_0284	1	2	2	1	2	2	2	1	2	2	1	1	2	2	0	1	1	0	1	3	2	3	2	1	1	3	2	0	2	0	2	2	1	0	0
Dsui_0290	0	0	0	0	0	0	0	0	0	0	0	0	0	1	0	0	0	0	0	0	0	0	0	0	0	0	0	0	0	0	0	0	0	0	0
Dsui_0317	0	0	0	0	0	0	0	0	0	0	0	0	0	2	0	0	0	0	0	0	0	0	0	0	0	0	0	0	0	0	0	1	0	0	0
Dsui_0318	0	0	0	0	0	0	0	0	0	0	0	0	1	4	0	0	0	0	0	0	0	0	0	0	0	0	0	0	0	0	0	1	0	0	0
Dsui_0326	0	0	0	0	0	0	0	0	0	0	0	0	0	1	0	0	0	0	0	0	0	0	0	0	0	0	0	0	0	0	0	0	0	0	0
Dsui_0327	0	1	0	0	0	0	0	0	0	0	0	0	0	0	0	0	0	0	0	0	1	0	0	0	0	0	0	0	0	0	0	0	0	0	0
Dsui_0332	1	0	1	0	0	1	0	0	1	0	0	0	0	0	0	0	0	2	0	0	0	0	0	0	0	0	0	0	0	0	0	1	0	0	1
Dsui_0333	0	3	1	1	1	1	3	2	0	1	1	7	0	1	2	3	0	1	2	2	1	1	1	1	1	2	1	0	0	0	2	4	0	0	2
Dsui_0334	0	0	0	0	1	0	0	0	0	0	0	1	0	0	0	0	0	0	0	0	0	0	0	0	0	1	0	0	0	0	0	0	2	0	0
Dsui_0335	0	0	0	0	0	0	0	0	1	0	0	0	0	0	0	0	2	1	0	0	0	0	0	0	0	0	0	0	0	0	0	0	0	0	1
Dsui_0336	0	0	0	0	0	0	0	0	0	0	0	0	0	0	1	0	0	0	0	0	0	0	0	0	0	1	0	0	0	0	0	0	0	0	0
Dsui_0340	0	0	0	0	0	0	0	0	0	1	0	3	0	0	0	0	0	1	0	0	0	0	0	0	0	0	0	0	0	0	0	0	0	0	1
Dsui_0341	0	0	0	0	0	0	0	0	0	0	0	1	0	0	0	0	0	0	0	0	0	0	0	0	0	0	0	0	0	0	0	0	0	0	0
Dsui_0342	0	0	0	0	0	0	0	0	0	0	0	3	0	0	0	0	0	0	0	0	0	0	0	0	0	1	0	0	0	0	0	0	0	0	0
Dsui_0343	1	1	0	0	0	0	0	0	0	0	0	0	0	0	0	1	0	0	0	0	0	1	0	0	0	0	0	0	0	0	0	1	0	0	0
Dsui_0344	2	2	2	0	0	2	0	0	4	1	0	2	0	0	0	3	2	1	2	0	0	0	0	0	0	0	0	0	0	0	1	0	2	0	1
Dsui_0345	1	2	1	1	0	0	0	0	0	1	0	1	0	1	0	1	0	1	1	1	0	1	0	0	0	2	1	0	0	0	0	0	0	1	0
Dsui_0346	1	1	0	1	0	0	2	0	1	1	1	1	0	0	1	1	0	0	1	1	0	0	0	0	0	1	1	0	0	0	0	0	0	0	0
Dsui_0347	1	2	1	0	1	1	1	0	1	1	1	0	1	1	1	0	1	1	1	1	0	1	0	0	0	1	1	0	0	0	1	1	0	0	1
Dsui_0348	1	0	0	0	0	0	0	0	1	0	0	0	0	0	0	0	1	0	0	0	0	0	0	0	0	0	0	0	0	0	0	0	0	0	0
Dsui_0349	0	0	0	0	0	0	0	0	2	0	0	2	0	0	0	0	0	1	0	0	0	0	0	0	0	0	0	0	0	0	0	0	0	0	1
Dsui_0350	1	1	1	0	0	1	1	1	1	1	0	1	0	1	1	1	1	1	0	2	1	1	0	1	0	1	1	1	0	0	0	1	1	1	0
Dsui_0351	1	0	0	1	0	0	0	0	1	1	2	2	0	0	1	1	0	1	0	0	0	1	1	0	0	0	1	0	0	0	0	0	0	0	1
Dsui_0352	0	0	0	0	0	0	0	0	1	0	0	1	0	0	0	0	0	0	0	0	0	0	0	0	0	0	0	1	0	1	0	0	0	0	1
Dsui_0353	2	3	1	1	1	1	3	0	1	0	0	3	1	0	1	1	0	2	1	2	0	0	0	0	0	1	0	1	0	0	0	0	0	0	0
Dsui_0354	0	0	0	0	0	0	0	0	1	0	0	2	0	0	0	0	1	0	0	0	0	0	0	0	0	0	0	0	0	0	0	0	0	0	0
Dsui_0355	2	1	0	0	0	0	0	0	0	0	0	0	0	0	0	0	1	1	0	0	0	0	0	0	0	0	0	0	0	0	0	0	0	0	1
Dsui_0356	1	1	0	0	0	0	0	0	3	0	0	2	0	0	1	1	3	2	1	0	0	1	0	0	0	0	0	0	0	0	0	0	0	0	1
Dsui_0357	0	0	1	0	0	0	0	0	0	0	0	2	0	0	0	0	0	1	0	0	0	0	0	0	0	0	0	1	0	0	0	0	0	0	1
Dsui_0358	0	2	1	0	0	0	0	0	3	1	1	3	0	0	3	2	1	1	1	0	0	0	0	0	0	1	0	0	0	0	0	0	1	0	2
Dsui_0359	0	0	2	0	1	2	0	0	2	3	1	1	0	0	0	1	2	0	1	0	0	1	0	0	0	0	0	0	0	0	0	0	1	0	0
Dsui_0360	2	0	0	2	1	1	2	1	0	1	2	2	2	2	2	2	0	1	1	2	0	1	1	0	0	3	2	0	0	0	1	1	1	0	1
Dsui_0362	6	8	11	6	1	5	9	4	5	4	3	7	3	5	2	4	4	1	4	10	8	7	6	1	0	13	12	1	0	1	7	10	9	1	1
Dsui_0363	3	3	1	1	0	0	1	0	2	2	3	4	0	0	1	2	1	3	1	1	0	1	0	0	0	2	1	1	1	0	0	0	0	0	1
Dsui_0365	3	4	4	3	4	3	5	1	5	2	4	5	2	4	2	4	3	0	1	1	0	0	0	1	0	0	0	0	0	0	0	1	0	0	1
Dsui_0366	8	10	8	7	3	4	13	4	2	4	7	9	7	8	5	6	1	1	2	1	0	2	1	2	2	5	4	0	0	0	2	6	0	0	2
Dsui_0367	0	3	1	1	0	2	3	0	0	1	0	0	2	2	1	0	0	0	1	1	2	0	0	0	0	0	1	0	0	0	0	1	0	0	0
Dsui_0368	4	4	3	2	1	2	3	0	3	0	2	3	0	3	1	2	2	1	0	1	0	2	2	0	0	0	0	0	0	0	2	2	0	0	1
Dsui_0369	2	3	1	0	0	1	1	0	1	2	2	6	2	1	1	2	2	5	2	3	0	1	0	0	0	2	1	0	1	1	1	0	1	0	2
Dsui_0370	1	1	1	0	0	1	0	1	0	0	0	2	1	0	0	2	1	2	0	0	0	0	0	0	0	0	0	0	0	0	0	0	0	0	2
Dsui_0371	0	0	0	1	0	1	0	1	0	1	1	2	0	1	0	0	0	1	0	2	1	0	0	1	0	1	1	0	0	0	2	1	0	0	0
Dsui_0374	8	10	10	12	10	10	7	8	10	8	15	18	8	10	10	14	10	5	10	12	12	8	7	7	8	13	11	9	7	8	14	15	10	6	7
Dsui_0388	0	1	0	0	0	0	0	0	0	0	0	1	0	0	0	0	0	0	0	0	0	0	0	0	0	0	0	0	0	0	0	0	0	0	0
Dsui_0389	0	2	2	0	0	0	2	0	0	0	0	0	0	1	0	0	0	0	0	0	0	1	0	0	0	1	2	0	0	0	0	2	0	0	0
Dsui_0394	0	0	0	0	0	0	1	0	0	0	0	0	0	1	0	0	0	0	0	0	0	0	0	0	0	0	0	0	0	0	0	0	0	0	0
Dsui_0407	0	1	1	2	0	0	2	0	0	1	1	2	0	1	0	1	0	0	0	0	2	0	1	0	0	0	2	0	0	0	1	1	0	0	0
Dsui_0434	1	0	0	0	0	0	0	0	0	0	0	0	0	0	0	0	0	0	0	0	0	0	0	0	0	0	0	0	0	0	0	0	0	0	0
Dsui_0435	0	0	0	0	0	0	0	0	0	0	0	2	0	0	0	0	0	0	0	0	0	0	0	0	0	0	0	0	0	0	0	0	0	0	0
Dsui_0457	0	0	0	0	0	0	0	0	0	0	0	0	0	0	0	0	0	0	0	1	0	1	0	0	0	0	0	0	1	0	0	0	0	0	0
Dsui_0474	0	1	0	0	0	0	0	0	0	0	0	0	0	0	0	0	0	0	0	0	0	0	0	0	0	0	1	0	0	0	0	0	0	0	0
Dsui_0478	3	4	2	4	1	1	1	0	1	1	0	2	3	2	0	3	1	3	1	5	5	4	4	3	3	5	3	4	2	2	5	4	3	5	2
Dsui_0479	0	0	0	0	0	0	0	0	0	0	0	0	0	0	0	0	0	0	0	0	0	0	1	0	0	1	0	1	0	1	1	0	0	0	0
Dsui_0508	0	0	0	0	0	0	0	0	0	0	3	6	1	3	4	2	1	4	3	0	0	0	0	0	0	0	0	0	0	8	11	10	9	19	5
Dsui_0511	0	0	0	0	0	0	0	0	0	0	0	1	0	0	0	0	1	0	0	0	0	0	0	0	0	0	0	0	0	1	0	0	1	3	0
Dsui_0516	1	1	1	0	0	0	1	1	1	0	2	1	0	0	0	0	0	0	0	1	2	0	0	0	0	1	1	0	0	0	0	0	0	0	0
Dsui_0517	0	0	0	3	0	0	1	2	0	0	1	2	0	0	1	1	0	2	0	0	0	0	0	0	0	0	2	0	0	0	0	0	0	0	1
Dsui_0519	1	1	0	0	0	0	1	0	2	0	1	0	0	1	1	1	0	0	0	0	1	0	0	0	0	0	1	0	0	0	0	0	0	0	0
Dsui_0527	0	0	0	0	0	0	0	0	0	0	0	0	0	0	0	0	0	0	0	1	0	0	0	0	0	0	0	0	0	0	0	0	0	0	0
Dsui_0543	1	1	0	0	0	0	0	0	0	0	0	0	0	0	0	0	0	0	0	0	0	0	0	0	0	0	0	0	0	0	0	0	0	0	0
Dsui_0592	0	1	0	0	0	0	0	0	0	0	0	0	0	0	0	0	0	0	0	0	0	0	0	0	0	0	0	0	0	0	0	0	0	0	0
Dsui_0604	0	0	0	0	0	0	0	0	0	0	0	1	1	0	0	0	1	0	0	0	0	0	0	0	0	0	0	0	0	0	0	0	0	0	0
Dsui_0622	0	2	0	0	0	0	0	0	0	0	1	3	0	0	0	0	0	0	0	1	1	0	0	0	0	0	0	0	0	3	0	0	0	0	0
Dsui_0631	1	1	0	0	0	0	1	0	0	0	0	0	0	0	0	0	0	0	0	2	1	1	1	0	0	1	1	0	5	0	0	0	0	1	0
Dsui_0639	1	2	0	0	0	0	1	0	0	0	0	0	0	0	0	0	0	0	0	0	1	0	0	0	0	0	0	0	0	0	0	0	0	0	0
Dsui_0642	1	1	0	0	0	0	1	0	0	0	0	0	1	0	0	1	0	0	0	1	0	0	0	0	0	0	0	0	0	0	0	1	0	0	0
Dsui_0645	0	2	1	0	0	0	1	0	1	0	0	1	0	1	0	0	1	3	0	2	1	0	0	0	0	1	0	0	0	0	2	2	0	0	1
Dsui_0657	0	1	0	0	0	0	0	0	0	1	0	1	0	0	0	0	0	0	0	2	0	0	0	0	0	3	1	0	0	0	0	0	0	0	0
Dsui_0659	2	2	0	0	0	0	3	2	0	1	0	0	0	0	1	1	0	0	1	0	4	0	0	0	0	1	3	0	1	0	1	0	0	0	0
Dsui_0664	1	1	1	1	0	0	0	0	1	0	1	1	1	1	1	1	1	0	0	2	2	0	1	0	0	1	0	0	0	0	1	1	0	0	0
Dsui_0673	0	0	0	0	0	0	0	0	0	0	0	0	0	0	0	0	0	0	1	0	0	0	0	0	0	0	0	0	0	0	0	0	0	0	0
Dsui_0684	1	1	0	0	0	0	0	0	2	0	0	2	0	1	1	0	0	0	0	1	0	0	0	0	0	0	0	0	0	0	0	0	0	0	0
Dsui_0698	0	0	0	0	0	0	0	0	0	1	0	0	0	0	0	1	0	0	0	0	0	0	0	0	0	0	0	0	0	0	0	0	0	0	0
Dsui_0703	0	1	0	0	0	0	0	0	0	0	0	0	0	0	0	0	0	0	0	0	0	0	0	0	0	2	0	0	0	0	0	0	0	0	0
Dsui_0707	0	0	0	0	0	0	0	0	0	0	0	1	0	0	0	0	0	0	0	0	0	0	0	0	0	0	3	0	0	0	0	0	0	0	0
Dsui_0715	1	1	0	0	0	0	0	0	0	0	0	1	0	0	0	0	0	0	0	0	1	0	0	0	0	0	1	0	0	0	0	0	0	0	0
Dsui_0782	1	1	0	0	0	0	0	0	0	0	0	0	0	0	0	0	0	0	0	0	0	0	0	0	0	0	0	0	0	0	0	0	0	0	0
Dsui_0799	2	3	0	0	0	0	2	0	0	1	2	4	0	0	1	1	1	0	0	1	2	0	0	0	0	0	1	0	0	0	0	0	0	0	0
Dsui_0818	0	0	0	0	0	0	0	1	0	0	0	0	0	0	0	0	0	0	0	1	0	1	1	0	0	1	0	1	0	0	0	0	1	1	0
Dsui_0822	0	0	0	0	0	0	0	0	0	0	0	0	0	0	1	1	0	0	0	0	0	0	0	0	0	0	0	0	0	0	0	0	0	0	0
Dsui_0829	0	0	0	0	0	0	0	0	0	1	0	0	0	0	0	0	0	0	0	0	1	0	0	0	0	1	2	0	0	0	0	0	0	0	0
Dsui_0830	0	0	2	0	0	1	0	0	1	0	0	0	1	1	0	0	0	0	0	0	0	1	1	0	0	0	0	0	1	0	1	1	0	0	0
Dsui_0844	2	1	0	0	0	0	0	0	0	1	0	0	0	0	0	0	1	0	0	2	1	0	0	0	0	3	0	0	1	0	0	0	1	1	0
Dsui_0853	0	1	0	0	0	0	0	0	0	0	1	1	0	0	1	1	1	0	0	1	0	0	0	0	2	0	1	0	0	0	2	2	0	0	1
Dsui_0854	0	1	1	1	0	0	1	0	2	0	0	2	0	0	0	1	2	1	0	3	0	1	0	0	1	1	1	0	0	0	2	2	0	0	3
Dsui_0855	8	7	9	7	6	6	8	1	8	5	1	3	7	11	0	1	7	7	2	3	1	2	2	4	3	2	3	1	0	0	3	8	1	0	9
Dsui_0856	2	2	2	2	2	1	1	0	1	1	0	0	1	3	0	0	1	0	0	0	0	0	0	0	1	0	2	0	0	0	0	0	0	0	0
Dsui_0857	10	11	12	10	11	12	5	1	10	4	2	10	13	16	1	4	9	8	5	3	0	6	3	4	2	7	5	0	0	0	5	7	1	0	7
Dsui_0858	1	1	1	0	0	0	1	1	2	0	1	1	1	1	1	0	0	0	0	1	2	1	1	0	0	2	3	0	0	0	0	1	0	0	0
Dsui_0860	0	1	0	0	0	0	1	0	0	0	0	0	0	0	0	0	0	0	0	0	0	0	0	0	0	0	0	0	0	0	0	0	0	0	0
Dsui_0871	1	2	1	2	1	1	0	1	1	1	1	0	0	0	1	2	0	0	2	2	1	1	1	1	1	1	1	1	0	0	0	1	0	1	1
Dsui_0882	0	0	0	0	0	0	0	0	0	0	0	0	0	0	0	7	11	0	0	0	0	0	0	0	0	0	0	0	0	0	0	0	10	10	0
Dsui_0884	1	2	0	0	0	0	2	0	0	1	0	0	0	0	0	0	0	0	0	0	1	0	0	0	0	0	0	0	0	0	0	0	0	0	0
Dsui_0886	0	0	0	0	0	0	0	0	0	0	0	1	0	0	0	0	0	0	0	0	0	0	0	0	0	0	0	0	0	0	0	0	0	0	0
Dsui_0888	1	1	1	0	0	1	0	0	0	0	0	2	0	0	0	0	0	2	0	2	2	0	0	0	0	1	1	0	0	0	0	0	0	0	2
Dsui_0899	2	1	1	0	0	0	1	0	0	1	0	0	1	0	0	0	1	0	0	2	1	2	2	0	1	2	0	0	1	0	2	1	0	1	0
Dsui_0932	0	0	0	0	0	0	1	0	0	0	0	0	0	0	0	0	0	0	0	1	0	0	1	0	0	0	0	1	2	0	0	0	0	1	0
Dsui_0935	0	0	0	0	0	0	0	0	1	0	0	0	0	0	0	0	0	0	0	1	0	0	0	0	0	1	0	0	0	0	0	1	0	1	0
Dsui_0962	0	0	0	0	0	0	0	0	0	0	0	1	0	0	0	0	0	0	0	0	0	0	0	0	0	0	0	0	0	0	0	0	0	0	0
Dsui_0971	0	0	0	0	0	0	1	0	0	0	0	0	0	0	0	0	0	0	0	0	0	0	0	0	0	0	0	0	0	0	0	0	0	0	0
Dsui_1025	0	0	0	0	0	0	0	0	0	0	0	0	0	0	0	0	0	0	0	0	0	0	1	0	0	2	0	1	0	0	0	0	0	0	0
Dsui_1026	0	0	0	0	0	0	1	0	0	1	0	0	0	0	0	0	0	0	0	0	0	0	1	0	0	0	1	4	3	0	4	2	0	4	0
Dsui_1036	0	0	0	0	0	0	1	0	0	0	0	1	0	0	0	0	0	0	0	0	0	0	0	0	0	0	0	0	0	0	0	0	0	0	0
Dsui_1037	3	5	3	2	2	2	2	2	2	3	1	2	3	3	2	1	2	1	3	2	1	2	1	0	0	2	0	0	1	0	1	2	2	0	1
Dsui_1043	0	0	0	0	0	0	0	0	0	0	0	0	0	0	0	0	0	0	0	0	0	0	0	0	0	0	1	0	0	0	0	0	0	0	0
Dsui_1047	0	0	0	1	0	0	0	0	0	0	0	0	0	0	0	0	0	0	0	0	0	0	0	0	0	0	0	0	0	0	0	0	0	0	0
Dsui_1048	2	4	2	4	3	1	0	0	4	2	1	5	0	2	1	3	1	5	1	0	0	0	0	0	0	0	0	0	0	0	0	1	0	0	3
Dsui_1049	0	0	0	0	0	0	0	0	0	0	0	0	0	0	0	0	0	0	0	1	0	0	0	0	0	0	0	2	1	1	0	0	0	1	0
Dsui_1054	0	0	0	0	0	0	0	0	0	0	0	0	0	0	0	0	0	0	0	0	1	0	0	0	0	0	0	0	0	0	0	0	0	0	0
Dsui_1081	0	0	1	0	0	0	0	0	0	0	0	0	0	0	0	0	1	0	0	1	0	1	1	0	0	0	0	0	2	0	0	0	0	1	0
Dsui_1091	0	0	0	0	0	0	0	0	0	0	0	0	0	0	0	0	0	0	0	0	0	0	0	0	0	0	0	1	1	0	0	0	0	0	0
Dsui_1096	0	0	1	1	0	0	0	0	0	0	0	0	0	0	0	0	0	0	0	0	1	1	0	0	0	1	1	0	0	0	0	0	0	0	0
Dsui_1097	0	2	0	0	0	1	1	0	0	1	0	1	0	0	0	0	0	0	0	0	0	0	0	0	0	0	2	0	0	0	0	0	0	0	0
Dsui_1105	0	0	0	0	0	0	0	0	1	0	0	0	0	0	0	0	0	0	0	0	0	0	0	0	0	0	0	0	0	0	0	0	0	0	0
Dsui_1112	0	0	0	0	0	0	0	0	0	0	0	0	0	0	0	0	0	0	0	0	0	1	0	0	0	0	0	0	0	0	0	0	0	0	0
Dsui_1116	2	2	1	0	0	1	1	0	1	0	0	1	0	0	0	1	0	2	0	2	3	0	0	0	0	2	0	0	0	0	1	1	0	0	2
Dsui_1122	0	3	0	1	2	3	0	0	0	0	2	8	0	0	1	3	0	1	0	2	2	1	0	0	0	1	1	0	0	0	0	3	1	0	1
Dsui_1166	3	0	7	2	4	4	0	0	0	0	0	0	0	0	0	0	0	0	0	6	5	10	9	8	7	0	0	0	0	0	0	0	0	0	0
Dsui_1171	0	0	0	0	0	0	0	0	0	0	0	0	0	0	0	0	0	0	0	0	0	0	0	0	0	0	0	0	0	0	0	1	0	0	0
Dsui_1176	0	0	0	0	0	0	0	0	0	0	0	0	0	0	0	0	0	1	0	0	0	0	0	0	0	0	0	0	0	0	0	0	0	0	0
Dsui_1177	0	0	0	0	0	0	0	0	0	0	0	1	0	0	0	0	2	4	0	0	0	0	0	0	0	0	0	0	0	7	4	2	2	6	4
Dsui_1191	0	0	0	0	0	0	0	0	0	0	0	0	0	0	0	0	0	0	0	0	0	1	1	0	0	0	0	0	0	0	2	1	0	1	0
Dsui_1200	0	1	0	0	0	0	0	0	0	0	0	0	0	0	0	0	0	0	0	1	1	0	0	0	0	0	0	0	0	0	0	0	0	0	0
Dsui_1209	0	1	0	0	0	0	0	0	0	0	0	0	0	0	0	0	0	0	0	0	0	0	0	0	0	0	0	0	0	0	0	0	0	0	0
Dsui_1212	0	0	0	0	0	0	0	0	0	0	0	0	0	0	0	0	1	0	0	0	0	0	0	0	0	0	0	0	0	0	0	0	0	0	1
Dsui_1220	0	0	1	0	0	1	0	0	0	0	0	0	0	0	0	0	0	0	0	0	0	0	0	0	0	0	0	0	0	0	0	0	0	0	0
Dsui_1245	0	0	0	0	0	0	1	1	0	0	0	0	1	0	0	0	0	0	0	0	0	0	0	0	0	0	0	0	0	0	0	0	0	0	0
Dsui_1247	0	0	0	0	0	0	0	0	1	0	0	0	0	0	0	0	1	0	0	0	0	0	0	0	0	0	0	0	0	0	0	0	0	0	0
Dsui_1248	0	1	0	0	0	0	1	0	0	0	0	0	0	0	0	0	0	0	0	0	0	0	0	0	0	0	1	0	0	0	0	0	0	0	0
Dsui_1253	2	1	0	0	0	0	2	0	0	0	0	5	0	0	1	1	1	0	0	5	1	0	0	0	0	4	3	0	0	0	0	0	0	0	1
Dsui_1261	1	0	0	0	0	0	0	0	0	0	0	0	0	0	0	0	0	0	0	0	0	0	0	0	0	0	0	0	0	0	0	0	0	0	0
Dsui_1265	2	2	2	1	0	0	1	0	1	0	0	3	1	1	0	0	0	0	0	2	2	1	1	0	0	3	4	1	0	0	1	0	0	0	1
Dsui_1270	0	0	0	0	0	0	0	0	0	0	0	2	0	0	0	0	0	0	0	3	0	1	1	0	0	2	1	3	2	0	0	1	0	6	1
Dsui_1275	0	0	0	0	0	0	1	0	0	0	0	1	0	0	0	0	0	0	0	0	0	0	0	0	0	0	0	0	0	0	0	0	0	0	0
Dsui_1276	0	0	0	0	0	0	0	0	0	0	0	0	0	0	0	0	0	0	0	0	0	0	1	0	1	0	0	0	0	0	0	0	0	0	0
Dsui_1282	0	0	0	0	0	0	0	0	0	0	0	0	0	0	0	0	0	0	0	0	0	0	0	0	0	1	0	1	0	0	1	1	0	1	0
Dsui_1309	0	2	1	1	1	1	0	2	1	0	1	1	1	2	0	0	1	0	0	0	1	0	0	0	0	1	0	0	0	0	0	0	0	0	0
Dsui_1310	2	2	2	3	2	3	1	0	1	2	2	4	0	2	0	2	0	0	1	2	2	3	3	3	2	3	4	2	1	1	3	4	2	0	0
Dsui_1315	0	0	0	0	0	0	0	0	0	0	0	1	0	0	0	0	0	0	0	0	0	0	0	0	0	0	0	0	0	0	0	0	0	0	0
Dsui_1324	0	0	0	0	0	0	0	0	0	0	0	0	0	0	0	0	0	0	0	0	0	0	0	0	0	1	0	0	0	0	0	0	0	0	0
Dsui_1326	0	0	0	2	0	1	0	0	0	0	0	0	1	1	0	0	0	0	0	0	0	0	0	0	0	0	1	0	0	0	0	0	0	0	0
Dsui_1330	1	0	1	1	0	0	0	0	2	1	1	1	0	0	0	0	1	0	0	2	0	0	0	0	0	0	0	0	0	0	0	0	0	0	1
Dsui_1331	1	1	0	0	0	0	1	0	0	0	0	0	0	0	0	1	0	1	1	1	1	0	0	0	0	2	1	0	0	0	0	0	0	0	0
Dsui_1343	0	0	0	0	0	0	0	0	0	0	0	0	0	0	0	0	0	0	0	0	0	0	0	0	0	0	0	0	1	0	0	0	0	0	0
Dsui_1351	1	0	0	0	0	0	0	0	0	0	0	1	0	1	0	0	0	0	0	0	0	0	0	0	0	0	0	0	0	0	0	0	0	0	0
Dsui_1376	2	3	3	3	2	3	3	1	3	1	1	2	0	1	0	0	2	2	0	6	5	2	3	2	3	6	7	1	1	0	2	3	0	0	4
Dsui_1377	2	3	3	2	1	3	2	3	6	0	1	3	1	1	2	6	3	4	0	4	5	1	2	1	0	3	3	2	0	0	2	3	1	0	3
Dsui_1384	0	0	0	0	0	0	0	0	0	0	0	0	0	0	0	0	0	0	0	0	0	0	0	0	0	1	0	0	0	0	0	0	0	0	0
Dsui_1402	1	1	0	0	0	0	0	0	0	0	0	0	0	0	0	0	0	0	0	3	0	0	0	0	0	1	0	1	2	0	0	0	0	5	0
Dsui_1411	1	0	0	0	0	0	0	0	0	0	0	0	0	0	0	1	0	0	0	0	0	0	0	0	0	0	0	0	0	0	0	0	0	0	0
Dsui_1417	0	0	0	0	0	0	0	0	0	0	0	1	0	0	1	0	0	0	0	0	0	0	0	0	0	0	0	0	0	0	0	1	0	0	0
Dsui_1420	0	1	0	0	0	0	0	0	0	0	0	0	0	0	0	0	0	0	0	0	0	0	0	0	0	0	0	0	0	0	0	0	0	0	0
Dsui_1421	0	0	0	0	0	0	0	0	0	0	0	0	0	0	0	0	0	0	0	0	0	0	0	0	0	0	1	0	0	0	0	0	0	0	0
Dsui_1426	0	0	0	0	0	0	0	0	0	0	0	0	0	0	0	0	0	0	0	1	0	0	0	0	0	0	0	0	0	0	0	0	0	0	0
Dsui_1436	1	2	2	0	0	1	2	2	2	1	0	3	0	2	0	1	0	0	0	0	0	0	0	0	0	1	2	0	0	0	0	0	0	0	0
Dsui_1437	0	1	0	0	0	0	0	0	0	0	0	0	0	0	0	0	0	0	0	1	0	0	0	0	0	0	0	0	0	0	0	0	0	0	0
Dsui_1440	0	0	0	0	0	0	0	0	0	0	0	1	0	0	0	0	0	0	0	0	0	0	0	0	0	0	0	0	0	0	0	0	0	0	0
Dsui_1445	1	1	3	3	0	1	3	2	2	1	3	1	3	5	0	1	2	0	1	2	2	2	1	1	1	3	4	1	0	0	4	1	1	0	0
Dsui_1446	0	0	1	0	0	1	0	0	0	0	0	1	0	1	2	1	0	0	0	1	0	0	1	0	0	1	2	1	0	0	0	1	0	0	0
Dsui_1457	2	1	1	0	1	0	2	0	0	1	0	2	0	1	0	1	0	1	1	2	1	0	0	0	0	2	2	1	0	0	0	0	0	1	1
Dsui_1460	0	0	0	0	0	0	1	0	0	0	0	0	0	0	0	0	0	0	0	0	0	0	0	0	0	0	0	0	0	0	0	0	0	0	0
Dsui_1464	0	0	0	0	0	0	0	0	0	0	0	0	0	1	0	0	0	0	0	0	0	0	0	0	0	0	0	0	0	0	0	3	0	0	0
Dsui_1468	0	1	0	0	0	0	0	0	0	0	0	0	0	0	0	0	0	0	0	0	0	0	0	0	0	0	0	0	0	0	0	0	0	0	0
Dsui_1491	3	4	1	2	3	3	3	0	2	0	2	5	0	1	1	2	1	1	0	2	4	1	0	1	0	2	5	2	0	0	1	1	0	0	0
Dsui_1492	5	7	10	10	7	6	6	3	7	0	2	13	7	8	2	2	5	0	3	13	11	9	8	5	8	6	12	0	0	0	11	15	2	0	0
Dsui_1495	4	5	3	1	2	2	3	2	2	0	1	4	1	1	1	1	1	0	0	4	5	3	3	1	1	4	5	1	0	0	2	2	0	0	0
Dsui_1496	1	5	2	0	0	1	5	0	6	2	0	6	0	0	0	0	1	3	0	3	0	3	3	0	1	1	2	0	2	1	0	1	1	11	3
Dsui_1497	6	10	3	3	1	2	3	1	7	0	1	4	0	1	0	1	3	2	1	8	7	1	1	0	0	8	4	0	0	0	0	0	0	1	2
Dsui_1499	1	2	0	0	0	0	1	0	1	0	0	2	1	2	0	0	0	1	0	1	2	1	0	0	0	2	2	0	0	0	1	0	0	0	0
Dsui_1504	0	0	0	0	0	0	0	0	0	0	0	0	0	0	0	0	0	0	0	1	0	0	0	0	0	0	0	0	0	0	0	0	0	0	0
Dsui_1519	0	0	0	0	0	0	0	0	0	0	0	0	0	0	0	0	0	0	0	0	1	0	0	0	0	0	1	0	0	0	0	1	0	0	0
Dsui_1520	0	0	0	0	0	0	0	0	0	0	0	0	0	0	0	0	0	0	0	1	0	0	0	0	0	0	0	0	1	0	0	0	0	0	0
Dsui_1525	0	0	0	0	0	0	0	0	0	0	0	0	0	0	0	0	0	0	0	0	0	0	0	0	0	0	0	1	0	0	0	0	0	0	0
Dsui_1535	1	1	0	0	0	0	0	0	0	0	1	1	0	0	0	1	0	2	0	0	0	1	0	0	0	0	0	0	0	0	0	0	1	0	1
Dsui_1539	1	0	0	0	0	0	0	0	0	0	0	0	0	0	0	0	0	0	0	0	0	0	0	0	0	0	0	0	0	0	0	0	0	0	0
Dsui_1540	3	3	1	3	0	2	0	0	3	0	0	3	1	4	0	2	0	2	0	8	3	2	3	3	1	8	5	6	1	0	11	12	0	4	1
Dsui_1541	1	1	1	1	1	2	1	0	1	0	0	0	1	1	0	0	1	0	0	2	1	2	1	1	1	1	0	1	0	0	2	3	0	1	0
Dsui_1557	0	0	0	0	1	1	1	0	1	0	1	1	0	0	0	1	0	0	0	0	1	0	0	0	0	0	1	0	0	0	0	0	0	0	0
Dsui_1560	1	1	1	2	2	2	2	0	1	1	1	3	1	1	2	2	0	1	1	1	0	1	1	1	0	1	1	1	0	0	1	2	1	0	3
Dsui_1561	1	0	0	0	0	0	1	0	0	0	0	0	0	0	0	0	0	0	0	0	2	0	0	0	0	0	1	0	0	0	0	0	0	0	0
Dsui_1571	0	1	0	0	0	1	2	1	1	1	0	0	1	1	0	1	1	0	0	0	0	0	0	0	0	0	1	0	0	0	2	1	0	0	0
Dsui_1574	0	0	0	0	0	0	0	0	0	0	0	1	0	0	0	0	0	0	0	0	0	0	0	0	0	0	0	0	0	0	0	0	0	0	0
Dsui_1581	0	1	0	0	0	0	0	0	0	0	0	0	0	0	0	0	0	0	0	0	0	0	0	0	0	0	0	0	0	0	0	0	0	0	0
Dsui_1602	0	0	0	0	0	0	0	0	0	0	0	0	0	0	0	0	0	0	0	0	0	0	0	0	0	0	0	0	0	0	1	1	0	0	0
Dsui_1606	1	0	1	0	0	0	0	0	0	0	0	0	0	0	0	0	0	0	0	4	0	1	1	1	0	2	0	2	1	0	2	2	0	1	0
Dsui_1628	4	4	7	10	8	7	4	0	6	3	0	1	1	0	0	0	3	0	0	0	1	7	5	5	4	3	1	1	2	0	3	3	0	1	0
Dsui_1630	1	2	2	3	3	4	2	2	2	0	0	0	0	0	0	0	0	0	0	1	1	3	4	5	5	1	0	5	1	0	2	3	0	2	1
Dsui_1634	1	2	1	1	1	2	1	0	1	1	1	4	1	1	0	0	2	0	0	2	2	1	1	0	1	3	2	0	0	0	1	2	0	0	1
Dsui_1636	0	0	0	0	0	0	1	0	0	0	0	0	0	0	0	0	0	0	0	0	0	0	0	0	0	0	0	0	0	0	0	0	0	0	0
Dsui_1647	0	1	0	0	0	0	0	1	0	0	1	1	0	0	0	0	0	0	0	0	1	0	0	0	0	0	1	0	0	0	0	0	0	0	0
Dsui_1656	0	0	0	0	0	0	0	0	1	0	0	0	0	0	0	0	1	0	0	0	0	0	0	0	0	0	0	2	2	0	0	0	0	2	0
Dsui_1657	0	0	0	0	0	0	0	0	0	0	0	0	0	0	0	0	0	0	0	0	0	0	0	0	0	0	1	0	0	0	0	0	0	1	0
Dsui_1658	0	0	0	0	0	0	0	0	2	0	0	0	0	0	0	0	2	0	0	0	0	0	0	0	0	2	1	6	4	0	0	0	0	2	0
Dsui_1661	0	0	0	0	0	0	0	0	0	0	0	0	1	0	0	0	0	0	0	0	0	0	0	0	0	0	0	0	0	0	3	1	0	8	0
Dsui_1666	0	0	0	0	0	0	1	0	0	0	0	0	0	0	0	0	0	0	0	0	0	0	0	0	0	1	1	0	0	0	0	0	0	0	0
Dsui_1677	0	0	0	0	0	0	0	0	0	0	0	0	0	0	0	0	0	0	0	0	0	0	0	0	0	1	1	0	0	0	0	0	0	0	0
Dsui_1685	0	0	0	0	0	0	0	0	0	0	1	0	0	0	0	0	0	0	0	0	0	0	0	0	0	0	1	0	0	0	0	0	1	0	0
Dsui_1689	1	1	1	0	0	0	1	0	0	0	0	0	0	0	0	0	0	0	0	1	1	0	0	0	0	1	0	0	0	0	0	0	0	0	0
Dsui_1696	1	1	0	0	0	0	2	0	0	0	0	0	0	0	0	0	0	0	0	0	1	0	0	0	0	0	0	0	0	0	0	0	0	0	0
Dsui_1717	0	0	0	0	0	2	0	0	0	0	0	1	2	1	0	0	2	0	0	0	0	0	0	0	0	2	0	0	0	0	0	0	0	0	1
Dsui_1718	1	2	1	0	1	0	0	0	2	0	0	0	2	1	0	0	3	0	0	1	3	0	0	0	0	3	0	0	0	0	0	0	0	0	0
Dsui_1719	0	0	0	0	0	0	0	0	0	0	0	0	0	1	0	0	0	0	0	1	2	1	0	0	0	0	0	0	0	0	0	1	0	0	0
Dsui_1720	0	0	0	0	0	0	0	0	1	0	0	0	0	0	1	2	0	0	0	0	1	1	0	0	0	1	1	0	0	0	1	1	0	0	0
Dsui_1721	1	2	2	1	0	0	0	0	0	0	0	0	1	2	0	0	0	0	0	1	2	2	2	0	1	1	1	0	0	0	4	4	0	0	0
Dsui_1730	0	0	0	0	0	0	0	0	0	0	1	0	0	0	0	0	0	0	0	0	0	0	0	0	0	0	0	0	0	0	0	0	0	0	0
Dsui_1751	0	0	0	0	0	0	0	0	1	0	0	0	0	0	0	0	0	0	0	0	0	0	0	0	0	0	0	0	0	0	0	0	0	0	0
Dsui_1755	0	0	0	0	0	0	0	0	1	0	0	0	0	0	0	0	0	0	0	0	0	0	0	0	0	0	0	0	0	0	0	0	0	0	0
Dsui_1757	0	0	0	0	0	0	0	0	1	0	0	0	0	0	0	0	0	0	0	0	0	0	0	0	0	0	0	0	0	0	0	0	0	0	0
Dsui_1775	0	0	0	0	0	0	0	0	1	0	0	0	0	0	0	0	0	0	0	0	0	0	0	0	0	0	0	0	0	0	0	0	0	0	0
Dsui_1783	1	1	0	0	0	2	1	0	0	0	2	1	1	2	1	2	3	0	2	1	1	0	0	0	0	0	0	0	0	0	0	0	0	0	0
Dsui_1784	0	1	1	0	0	0	0	0	0	0	0	0	0	0	0	0	0	0	0	0	0	0	0	0	0	0	0	0	0	0	0	0	0	0	0
Dsui_1809	0	2	0	0	0	0	0	0	0	0	0	0	1	1	0	0	0	0	0	0	0	0	0	0	0	0	0	0	0	0	0	0	0	0	0
Dsui_1810	0	2	0	0	0	0	1	1	2	0	0	0	0	0	0	1	0	0	0	0	0	0	0	0	0	2	1	0	0	0	0	0	0	0	0
Dsui_1812	0	0	1	0	0	0	0	0	0	0	0	1	0	2	0	0	1	0	0	0	0	1	0	0	0	0	0	0	0	0	0	0	0	0	0
Dsui_1813	0	0	0	0	0	0	0	0	0	0	0	0	0	0	0	0	0	1	0	0	0	0	0	0	0	0	0	0	0	0	0	0	0	0	1
Dsui_1814	0	1	1	2	0	1	1	0	0	0	0	2	0	1	0	1	0	1	0	0	0	2	2	0	1	0	0	0	0	0	0	3	0	0	1
Dsui_1815	3	3	3	2	1	1	4	0	2	1	1	2	1	1	0	0	0	0	2	3	5	3	2	1	1	5	5	0	2	0	2	2	0	0	1
Dsui_1901	0	2	1	0	1	1	0	0	0	0	1	1	1	2	0	1	0	0	1	0	3	1	1	1	0	0	0	0	0	0	1	1	0	0	0
Dsui_1935	2	4	4	3	1	5	3	0	3	1	1	8	3	4	1	0	2	2	1	0	0	2	1	0	1	1	0	0	0	0	2	2	0	0	2
Dsui_1943	8	11	8	9	5	6	8	6	7	9	9	8	6	10	7	5	3	1	9	8	12	5	5	5	4	11	12	0	4	1	9	6	5	1	2
Dsui_1948	0	0	0	0	0	0	0	0	0	0	0	0	0	1	0	0	0	0	0	0	0	0	0	0	0	0	0	0	0	0	0	0	0	0	0
Dsui_1949	0	0	0	0	0	0	0	0	0	0	0	0	0	0	0	0	0	0	0	0	0	0	0	0	0	0	1	0	0	0	0	0	0	0	0
Dsui_1959	0	0	0	0	0	0	0	0	0	0	0	0	0	0	0	0	0	0	0	0	0	0	0	0	0	0	1	0	0	0	0	0	0	0	0
Dsui_1960	0	0	0	0	0	0	0	0	1	0	0	0	0	0	0	0	0	0	0	0	0	0	0	0	0	0	0	0	0	0	0	0	0	0	0
Dsui_1961	0	0	0	0	0	0	0	0	0	0	0	1	0	0	0	1	0	1	0	0	0	0	0	0	0	0	0	0	0	0	0	0	0	0	2
Dsui_1967	0	0	0	3	2	2	0	0	1	0	0	4	0	0	0	2	0	0	0	1	1	0	1	0	0	0	0	0	1	0	1	2	0	0	1
Dsui_1977	0	0	0	0	0	0	0	0	0	0	0	0	0	0	0	0	0	0	0	0	0	0	0	0	0	0	2	0	0	0	0	0	0	0	0
Dsui_1978	0	0	0	0	0	0	0	0	0	0	0	0	0	0	0	0	0	0	0	0	0	0	0	0	0	0	0	0	0	0	0	1	0	0	0
Dsui_1982	0	0	0	0	0	0	0	0	0	0	0	0	0	0	0	0	0	0	0	1	0	0	0	0	0	0	1	0	0	0	0	0	0	0	0
Dsui_1984	0	0	0	0	0	0	0	0	1	0	0	0	0	0	0	0	0	0	0	0	1	0	0	0	0	0	0	0	0	0	0	0	0	0	0
Dsui_1986	0	0	0	0	0	0	0	1	0	0	0	0	0	0	0	0	0	0	0	0	0	0	0	0	0	0	0	0	0	0	0	0	0	0	0
Dsui_1989	1	0	0	0	0	0	0	0	0	0	0	1	0	0	0	0	0	1	1	2	1	0	0	0	0	2	1	0	0	0	0	0	0	0	1
Dsui_1991	0	0	0	0	0	0	0	1	1	0	0	0	0	0	0	1	0	0	0	2	0	0	0	0	0	2	1	0	0	0	0	0	1	0	0
Dsui_1992	2	3	1	1	0	1	2	2	1	1	1	2	0	1	0	0	1	0	1	2	0	2	1	1	2	2	1	0	1	0	2	0	0	0	0
Dsui_1996	0	0	0	0	0	0	1	0	0	0	0	0	0	0	0	0	0	0	0	0	0	0	0	0	0	0	0	0	0	0	0	0	0	0	0
Dsui_2001	6	7	3	2	0	2	7	2	1	3	1	2	4	2	1	4	1	1	2	5	8	1	1	0	0	4	8	0	0	0	0	0	0	0	1
Dsui_2003	5	2	2	3	2	3	4	7	2	3	5	4	5	6	6	4	2	6	3	4	7	3	3	3	4	3	9	0	3	2	10	12	4	1	5
Dsui_2004	0	0	0	0	0	0	0	0	0	0	0	0	0	0	0	0	0	0	0	0	0	1	0	0	0	0	0	0	0	0	0	0	0	0	0
Dsui_2012	0	0	0	0	0	0	0	0	0	0	0	0	0	0	0	0	0	0	0	0	1	0	0	0	0	0	0	0	0	0	0	0	0	0	0
Dsui_2029	0	0	0	0	0	0	0	0	0	0	0	0	1	1	0	0	0	0	0	0	0	0	0	0	0	0	0	0	0	0	0	0	0	0	0
Dsui_2061	1	2	0	0	0	0	0	0	1	0	0	0	0	0	0	0	1	0	0	5	1	0	0	0	0	3	0	0	0	2	0	0	0	0	0
Dsui_2062	0	0	0	0	0	0	0	0	0	0	0	0	0	0	0	0	0	0	0	0	0	0	0	0	0	0	0	0	0	0	0	0	0	2	0
Dsui_2066	0	2	0	0	0	0	0	0	0	0	0	0	0	0	0	0	0	1	0	5	1	0	0	0	0	3	1	0	0	0	0	0	0	0	0
Dsui_2071	0	0	0	0	0	0	0	0	0	0	0	0	1	1	0	0	0	0	0	0	0	0	0	0	0	0	0	0	0	0	1	0	0	0	0
Dsui_2072	0	0	0	0	0	0	0	0	0	0	0	0	0	0	1	0	0	0	0	0	0	0	0	0	0	0	0	0	0	0	0	0	0	0	0
Dsui_2074	0	0	0	0	0	0	0	0	0	0	0	0	1	0	0	0	0	0	0	0	0	0	0	0	0	0	0	0	0	0	0	1	0	0	0
Dsui_2076	0	0	0	0	0	0	0	0	0	0	4	13	0	0	2	5	0	2	0	0	0	0	0	0	0	0	0	0	0	17	0	0	9	1	2
Dsui_2078	0	0	0	0	0	0	0	0	0	0	0	1	0	0	0	0	0	0	0	0	0	0	0	0	0	0	0	0	0	1	0	0	0	0	0
Dsui_2108	0	0	0	0	0	0	0	0	0	0	0	0	0	0	0	0	0	0	0	0	0	0	0	1	0	0	0	0	0	0	0	0	0	0	0
Dsui_2122	0	1	0	0	0	0	0	0	0	0	0	0	0	0	0	0	0	0	0	0	0	0	0	0	0	0	0	2	2	0	0	0	0	0	0
Dsui_2129	3	6	2	3	3	3	1	3	6	2	6	4	2	2	4	3	3	2	2	5	3	5	4	3	2	5	6	4	2	3	2	4	3	3	3
Dsui_2134	0	0	0	0	0	0	0	0	0	0	0	0	0	0	0	0	0	1	0	1	0	0	0	0	0	0	0	0	0	0	0	0	0	0	2
Dsui_2135	0	2	2	2	2	2	0	0	1	1	1	5	1	2	0	3	0	1	1	2	2	2	1	1	3	4	0	0	0	0	1	3	0	0	1
Dsui_2152	0	0	0	0	0	0	0	0	0	0	0	1	0	0	0	0	0	0	0	0	0	0	0	0	0	0	0	0	0	0	0	0	0	0	0
Dsui_2156	0	0	0	0	0	0	0	1	0	0	0	0	0	0	0	0	0	0	0	0	0	0	0	0	0	0	0	0	0	0	0	1	0	0	0
Dsui_2161	3	2	3	0	4	4	2	0	3	1	0	0	2	3	0	0	0	0	0	4	6	3	4	0	2	4	10	2	0	1	4	8	0	0	0
Dsui_2166	0	0	0	0	0	0	0	0	1	0	0	0	0	0	0	0	0	0	0	0	0	0	0	0	0	0	0	0	0	0	0	0	0	0	0
Dsui_2188	0	0	0	0	0	0	0	0	0	0	0	0	0	0	0	0	0	0	0	0	0	0	0	0	0	1	0	0	0	0	0	0	0	0	0
Dsui_2195	0	1	0	2	0	0	1	2	0	3	3	0	1	3	2	2	0	0	1	3	1	0	0	0	0	2	4	0	0	0	0	0	0	0	0
Dsui_2197	0	1	0	0	0	0	0	0	0	0	0	0	0	0	0	0	0	0	0	0	0	0	0	0	0	0	0	0	0	0	0	0	0	0	0
Dsui_2199	2	1	2	2	0	1	0	0	2	2	1	1	1	0	1	2	1	2	2	2	2	2	2	1	1	2	2	2	1	0	1	2	1	2	2
Dsui_2202	0	0	0	0	0	0	0	0	0	0	0	0	0	0	0	0	0	0	0	0	0	0	0	0	0	0	0	0	0	0	1	2	0	0	0
Dsui_2203	1	0	0	0	1	0	0	0	0	0	0	1	0	0	0	0	0	0	0	1	0	1	0	0	0	1	1	0	0	0	0	1	0	0	0
Dsui_2205	12	10	9	11	6	7	6	3	6	1	13	19	1	4	6	13	4	4	3	16	15	3	5	1	2	17	14	1	2	2	2	3	5	1	5
Dsui_2209	6	6	5	3	2	4	5	0	3	2	3	5	3	6	0	0	3	2	2	8	7	2	4	2	4	11	9	2	2	1	7	4	0	5	3
Dsui_2211	0	0	0	0	0	0	0	0	0	0	0	0	0	0	0	0	0	1	0	0	0	0	0	0	0	0	0	0	0	0	0	0	0	0	0
Dsui_2213	2	1	1	2	0	1	1	0	2	1	2	5	2	3	1	2	4	4	1	1	0	0	0	0	0	0	1	0	0	0	0	0	0	0	4
Dsui_2214	1	1	1	1	0	0	0	0	0	0	1	3	1	0	0	1	0	1	0	0	0	1	1	0	0	0	0	0	0	0	0	0	0	0	2
Dsui_2216	2	4	3	6	1	1	4	1	2	3	5	4	1	2	1	3	0	1	2	8	8	4	4	2	2	8	9	0	1	0	2	6	1	0	4
Dsui_2217	3	2	4	2	1	3	1	0	2	1	2	4	3	2	1	4	1	2	2	7	3	0	0	0	1	5	2	1	0	0	3	7	0	0	5
Dsui_2218	9	9	6	7	6	7	10	1	3	3	6	8	7	9	6	7	4	1	4	6	4	2	2	2	3	5	3	0	0	0	5	7	2	0	4
Dsui_2219	0	3	2	1	0	1	0	0	0	0	0	2	2	6	0	0	0	4	0	0	0	1	1	0	0	0	0	0	0	0	6	8	0	0	1
Dsui_2222	0	0	0	0	0	0	0	0	0	0	0	0	0	0	0	0	0	0	0	0	0	0	0	0	0	0	0	0	0	1	0	0	0	0	0
Dsui_2233	0	1	0	0	0	0	0	0	0	0	0	0	0	0	0	0	0	0	0	0	1	0	0	0	0	0	0	0	0	0	0	0	0	0	0
Dsui_2241	1	1	0	5	0	1	1	0	0	0	0	0	5	5	0	0	0	0	0	0	0	0	0	0	1	1	0	0	0	0	2	7	0	0	0
Dsui_2272	0	0	0	0	0	0	0	0	0	0	0	0	0	0	0	0	0	0	0	0	0	0	0	0	0	0	0	0	0	0	0	0	0	0	1
Dsui_2299	0	0	0	0	0	0	0	0	0	0	0	1	0	0	0	0	0	0	0	0	0	0	0	0	0	0	0	0	0	0	0	0	0	0	0
Dsui_2302	1	1	1	2	1	1	0	0	0	0	0	2	1	1	0	0	1	0	0	1	2	0	0	0	0	0	1	0	0	0	1	1	0	0	0
Dsui_2304	0	1	0	1	0	0	0	0	0	0	0	1	0	0	0	0	0	0	0	1	1	1	0	0	0	1	0	0	0	0	1	0	0	0	0
Dsui_2305	0	1	0	0	0	0	1	0	0	1	1	2	2	1	1	0	0	0	0	0	0	0	0	0	0	0	0	0	0	0	0	2	0	0	1
Dsui_2312	0	0	0	0	0	0	1	1	0	0	0	0	0	1	0	0	0	0	0	0	0	0	0	0	0	0	0	0	0	0	0	0	0	0	0
Dsui_2313	0	0	1	0	0	0	0	0	0	0	0	0	0	0	0	0	0	0	0	1	0	0	0	0	0	0	0	0	0	0	0	0	0	0	0
Dsui_2314	0	0	0	0	0	0	0	0	0	0	0	0	0	0	0	1	0	0	0	0	0	0	0	0	0	0	0	0	0	0	0	0	0	0	0
Dsui_2317	0	0	0	0	0	0	0	0	0	0	0	0	0	0	0	0	0	0	0	0	0	0	0	0	0	0	1	0	0	0	0	0	0	0	0
Dsui_2366	1	0	1	0	0	0	0	0	0	0	0	0	0	1	0	0	0	0	0	0	0	0	0	0	0	1	0	0	0	0	0	0	0	0	0
Dsui_2433	3	3	4	5	2	3	2	0	1	0	2	4	2	2	2	2	3	1	2	3	5	2	3	1	1	2	3	0	1	0	1	2	1	1	1
Dsui_2436	2	0	0	1	0	1	0	2	0	1	1	0	0	1	0	0	0	1	0	0	1	1	0	0	0	1	1	0	0	0	1	1	0	0	0
Dsui_2444	0	0	1	0	0	0	0	0	0	1	1	0	0	0	0	0	0	0	0	0	0	0	1	0	0	0	0	0	0	0	0	0	0	0	0
Dsui_2447	1	1	0	0	0	0	1	0	0	0	0	0	0	0	0	0	0	0	0	0	1	0	0	0	0	0	0	0	0	0	0	0	0	0	0
Dsui_2448	0	0	0	0	0	1	0	0	0	0	0	0	1	1	0	0	1	0	1	0	0	0	0	0	0	0	0	0	0	0	0	0	0	0	0
Dsui_2449	2	2	2	0	0	1	1	0	3	0	0	0	1	1	0	0	2	1	0	2	1	2	1	1	1	2	2	1	0	0	2	2	0	1	1
Dsui_2450	1	2	0	2	0	0	0	0	0	0	0	1	0	0	0	1	0	0	0	1	2	0	0	0	0	1	0	0	0	0	0	0	0	0	1
Dsui_2455	0	0	0	0	0	0	0	0	0	0	0	0	0	0	0	0	0	0	0	2	0	1	0	0	1	2	0	1	2	0	2	1	0	1	0
Dsui_2461	0	0	0	0	0	0	0	0	0	0	0	1	0	0	0	0	0	0	0	0	0	0	0	0	0	0	0	0	0	0	0	0	0	0	0
Dsui_2467	1	0	1	1	0	1	1	0	0	1	0	0	1	0	0	0	0	1	1	0	1	0	0	0	0	1	1	0	1	0	0	0	0	0	1
Dsui_2532	0	1	0	0	0	0	1	0	1	1	0	0	0	0	0	0	0	0	0	0	1	0	0	0	0	0	0	0	4	0	0	0	0	0	0
Dsui_2538	5	3	1	2	1	2	3	0	2	0	2	3	2	2	2	4	1	2	1	5	4	2	2	2	2	6	2	2	2	0	3	3	1	1	3
Dsui_2548	0	0	1	0	0	0	1	0	1	0	0	0	0	1	0	0	1	0	0	0	0	0	0	0	0	1	0	0	0	0	0	0	0	0	0
Dsui_2551	0	0	0	0	0	0	0	0	0	0	0	0	0	0	0	0	0	0	0	0	0	0	0	0	0	1	0	0	0	0	0	0	0	0	0
Dsui_2568	0	1	0	0	0	0	1	0	0	0	0	0	0	0	0	0	0	0	0	0	0	0	0	0	0	0	0	0	0	0	0	0	0	0	0
Dsui_2628	0	0	1	0	0	0	1	0	0	1	0	0	0	1	0	0	1	0	0	0	0	3	2	0	0	1	0	0	3	0	0	0	0	1	0
Dsui_2632	0	0	0	0	0	0	0	0	0	0	0	0	0	0	0	0	0	0	0	0	0	0	0	0	0	0	0	0	1	0	0	0	0	0	0
Dsui_2651	0	0	0	0	0	0	0	0	0	0	0	0	0	0	0	0	0	0	0	0	0	0	0	0	0	0	0	0	0	0	0	0	0	1	0
Dsui_2655	0	1	0	0	0	0	0	0	0	0	0	0	0	0	0	0	0	0	0	0	0	0	0	0	0	0	0	0	0	0	0	0	0	0	0
Dsui_2659	0	0	0	0	0	0	0	0	0	0	0	0	0	0	0	1	0	0	0	1	0	0	0	0	0	0	0	0	0	0	0	0	0	0	0
Dsui_2670	0	0	0	0	0	0	0	0	0	0	0	0	0	0	0	0	0	0	0	0	0	0	0	0	0	0	1	0	0	0	0	0	0	0	0
Dsui_2671	0	2	0	0	0	0	1	0	0	0	0	0	0	0	0	0	0	0	0	0	1	0	0	0	0	0	2	0	0	0	0	0	0	0	0
Dsui_2672	0	0	0	0	0	0	0	0	0	0	0	0	0	0	0	0	0	0	0	0	0	0	0	0	0	0	0	0	0	2	0	0	0	0	0
Dsui_2677	1	3	1	3	0	1	1	0	0	1	1	3	1	2	2	3	1	1	1	2	2	2	1	1	0	1	3	0	0	0	2	3	0	0	0
Dsui_2685	0	0	0	0	0	0	0	0	1	1	0	0	0	0	0	0	0	0	0	2	0	0	1	0	0	1	0	2	0	0	2	0	2	3	0
Dsui_2686	0	0	0	0	0	0	0	0	0	0	0	0	0	0	0	0	0	0	0	0	0	0	0	1	0	0	0	0	0	0	0	0	0	0	0
Dsui_2691	0	2	0	0	0	1	2	0	0	0	0	0	0	0	0	0	0	0	0	0	0	0	0	0	0	0	0	0	0	0	0	0	0	0	0
Dsui_2692	0	0	0	0	0	0	0	0	0	0	0	1	0	0	0	0	0	0	0	0	0	0	0	0	0	0	0	0	0	0	0	0	0	0	0
Dsui_2693	2	4	4	1	1	3	3	1	0	2	0	2	2	1	1	2	0	1	1	3	5	2	2	1	0	4	4	0	0	0	2	1	0	0	0
Dsui_2694	2	3	0	2	0	0	2	0	0	1	2	1	0	1	1	2	0	2	1	3	1	0	1	0	0	3	2	0	1	0	0	0	0	0	2
Dsui_2700	0	0	0	0	0	0	0	0	0	0	0	0	0	1	0	0	0	0	0	0	0	0	0	0	0	0	0	0	0	0	0	0	0	0	0
Dsui_2718	1	1	1	1	0	0	2	0	1	0	1	1	2	4	0	0	0	0	0	2	1	0	1	0	0	1	1	0	0	0	3	2	0	0	0
Dsui_2722	0	0	0	0	0	0	4	0	1	0	0	0	0	0	0	0	1	0	0	0	0	0	0	0	0	1	2	0	0	0	1	1	0	0	0
Dsui_2723	0	2	1	1	1	1	0	0	1	0	0	2	1	0	0	2	1	1	0	0	0	0	0	0	0	1	0	0	0	0	0	1	0	0	1
Dsui_2728	0	0	0	0	0	0	0	0	0	0	0	1	0	0	0	0	0	0	0	0	0	0	0	0	0	0	0	0	0	0	0	0	0	0	0
Dsui_2737	0	1	0	0	0	0	0	0	0	0	0	0	0	0	0	0	0	0	0	1	0	0	0	0	0	0	0	0	0	0	0	0	0	0	0
Dsui_2738	0	1	0	0	0	0	0	0	0	0	0	0	0	0	0	0	0	0	0	1	1	0	0	0	0	0	0	0	0	0	0	0	0	0	0
Dsui_2746	0	0	0	0	0	0	0	0	0	0	0	0	0	0	0	0	0	0	0	0	1	0	0	0	0	1	0	0	0	0	0	0	0	0	0
Dsui_2785	0	0	0	0	0	0	0	0	0	0	0	1	0	0	0	0	0	0	0	0	0	0	0	0	0	0	0	0	0	0	0	0	0	0	0
Dsui_2799	0	0	0	0	0	0	0	0	0	0	0	0	0	1	0	0	0	0	0	0	0	0	0	0	0	0	0	0	0	0	0	0	0	0	0
Dsui_2807	0	0	0	0	0	0	0	0	0	0	0	1	0	0	0	0	0	0	0	0	0	0	0	0	0	0	0	0	0	0	0	0	0	0	0
Dsui_2808	2	1	2	2	2	1	2	1	0	2	1	1	0	2	1	0	0	0	2	2	2	0	0	0	0	3	2	0	0	0	0	1	0	0	0
Dsui_2815	1	0	0	1	0	1	0	0	1	0	0	1	0	0	0	0	0	0	0	1	0	0	1	0	0	1	0	0	0	0	1	1	0	0	0
Dsui_2873	0	0	0	0	0	0	0	0	1	0	0	0	0	0	0	0	0	0	0	0	0	0	0	0	0	0	0	0	0	0	0	0	0	0	0
Dsui_2884	1	1	1	0	0	0	0	0	0	0	0	0	0	0	1	0	0	0	0	0	0	0	0	0	0	0	0	0	0	0	0	0	0	0	0
Dsui_2889	0	1	1	0	0	0	0	0	0	0	0	2	0	0	0	0	0	1	0	3	1	0	1	0	0	3	0	4	0	3	2	1	3	3	0
Dsui_2892	0	0	0	0	0	0	1	0	0	0	0	0	0	0	0	0	0	0	0	0	0	0	0	0	0	0	0	0	0	0	0	0	0	0	0
Dsui_2906	0	0	0	0	0	0	0	0	0	0	0	0	1	2	0	0	0	0	0	0	0	0	0	0	0	0	0	0	0	0	0	1	0	0	0
Dsui_2907	0	1	0	0	0	0	1	0	0	0	0	0	0	1	0	0	0	0	0	1	3	1	0	0	0	1	1	0	0	0	0	0	0	0	0
Dsui_2908	0	1	0	0	0	0	0	0	0	0	0	0	0	0	0	0	0	0	0	0	0	0	0	0	0	0	0	0	0	0	0	0	0	0	0
Dsui_2925	2	6	4	2	0	4	6	0	1	4	4	5	1	2	2	3	2	1	3	1	5	1	0	2	2	3	3	0	1	0	2	1	0	0	2
Dsui_2934	0	0	0	0	0	0	0	0	0	0	0	0	0	0	0	0	0	0	0	1	0	0	0	0	0	0	0	0	0	0	0	0	0	0	0
Dsui_2961	0	0	0	0	0	0	0	0	0	0	0	0	0	1	0	0	0	0	0	0	0	0	0	0	0	0	0	0	0	0	0	0	0	0	0
Dsui_2989	1	1	0	0	0	0	0	0	1	0	0	0	0	1	0	0	1	0	0	1	1	0	0	0	0	1	1	0	0	0	0	0	0	0	0
Dsui_3000	0	0	1	1	1	1	0	0	0	0	0	0	0	0	0	0	0	0	0	0	0	0	0	0	0	0	0	0	0	0	0	0	0	0	0
Dsui_3003	0	0	0	0	0	0	3	0	0	0	0	0	0	1	0	0	0	0	0	1	1	0	0	0	0	0	3	0	0	0	2	3	0	0	0
Dsui_3009	0	0	0	0	0	0	0	0	0	0	0	1	0	0	0	0	0	0	0	0	0	0	0	0	0	0	0	0	0	0	0	0	0	0	0
Dsui_3016	0	0	0	0	0	0	0	0	0	0	0	1	0	0	0	0	0	0	0	0	0	0	0	0	0	0	0	0	0	0	0	0	0	0	0
Dsui_3024	1	1	0	0	0	0	0	0	0	0	0	0	0	0	0	0	0	0	0	1	1	0	0	0	0	0	0	0	0	0	0	0	0	0	0
Dsui_3029	0	0	1	1	0	0	0	0	0	0	0	1	0	0	0	0	0	0	0	0	0	0	0	0	0	0	0	0	0	0	0	0	0	0	0
Dsui_3030	0	0	0	0	0	0	0	0	0	0	0	0	0	0	0	0	1	0	0	0	0	0	0	0	0	0	0	0	0	0	0	0	0	0	0
Dsui_3031	0	0	0	0	0	0	0	0	0	0	0	0	0	0	0	0	0	0	0	1	0	0	1	0	0	0	0	0	0	0	0	0	0	0	0
Dsui_3032	0	1	0	0	0	1	0	0	0	0	0	0	0	0	0	0	0	0	0	0	1	2	0	3	0	0	1	0	0	0	0	1	0	0	0
Dsui_3034	0	0	0	0	0	0	0	0	0	0	0	0	0	0	0	0	0	0	0	0	0	0	0	0	0	0	1	0	0	0	0	0	0	0	0
Dsui_3039	0	0	0	0	0	0	0	0	0	0	0	1	0	0	0	0	0	0	0	0	0	0	0	0	0	0	0	0	0	0	0	0	0	0	0
Dsui_3044	4	6	1	1	0	0	2	0	0	0	1	2	1	2	1	0	1	1	0	2	6	0	0	0	0	2	4	0	1	0	2	3	0	0	0
Dsui_3045	1	0	0	0	1	0	0	0	0	0	0	2	0	0	0	0	0	0	0	1	1	0	0	0	0	0	1	0	0	0	0	0	0	0	0
Dsui_3047	0	0	0	0	0	0	1	0	0	0	0	0	0	1	0	0	0	0	0	1	0	0	0	0	0	0	0	0	0	0	0	0	0	0	0
Dsui_3048	1	1	0	0	0	0	0	0	0	0	0	0	0	0	0	0	0	0	0	2	1	0	0	0	0	1	1	0	0	0	0	0	0	0	0
Dsui_3059	0	0	0	1	0	0	0	0	0	0	0	0	0	0	0	0	0	0	0	0	0	0	0	0	0	0	0	0	0	0	1	0	0	0	0
Dsui_3063	0	0	0	0	0	0	0	0	0	0	0	0	1	1	0	0	0	0	0	0	0	0	0	0	0	0	0	0	0	0	0	0	0	0	0
Dsui_3064	3	5	2	2	1	0	3	0	1	2	1	1	0	4	0	0	2	0	0	1	1	0	0	0	0	2	3	0	0	0	1	2	0	0	0
Dsui_3065	0	0	0	0	0	0	0	0	0	0	0	1	0	0	0	0	0	0	0	1	0	0	0	0	0	0	0	0	0	0	0	0	0	0	0
Dsui_3066	0	0	0	0	0	0	0	0	0	0	0	0	1	0	0	0	0	0	0	0	0	0	0	0	0	0	0	0	0	0	0	0	0	0	0
Dsui_3070	0	0	0	0	0	0	0	0	0	0	0	0	0	0	0	0	0	0	0	3	0	1	0	0	0	1	0	1	1	1	0	0	2	4	0
Dsui_3078	0	0	0	0	0	0	0	2	0	0	2	2	0	0	0	0	1	0	0	2	0	0	0	0	0	0	1	0	0	0	1	1	0	0	0
Dsui_3080	0	0	1	0	0	0	2	0	0	0	0	0	2	2	0	0	0	0	0	0	0	0	1	0	0	1	0	0	0	0	2	1	0	0	0
Dsui_3081	3	5	4	3	2	6	8	3	1	5	3	5	3	4	0	1	0	0	2	6	7	6	4	5	6	9	7	0	3	1	6	8	0	0	0
Dsui_3083	0	0	1	0	0	0	0	0	0	0	0	0	0	0	0	0	0	0	0	0	0	0	2	0	1	0	0	1	3	0	0	0	0	5	0
Dsui_3085	0	0	0	0	0	0	0	0	0	0	0	0	0	0	0	0	0	0	0	0	0	0	0	0	0	0	0	1	0	0	0	0	0	0	0
Dsui_3087	0	1	0	0	0	0	0	0	0	0	0	0	0	0	0	0	0	0	0	6	2	2	2	1	0	3	1	3	2	0	1	0	1	4	0
Dsui_3088	2	1	0	1	0	0	1	1	0	0	0	0	1	1	0	0	0	0	0	1	3	0	0	0	0	3	3	0	0	0	1	1	0	0	0
Dsui_3109	0	0	0	0	0	0	0	0	0	0	1	1	0	0	0	1	1	1	0	0	0	0	0	0	0	0	0	0	0	0	0	0	1	0	0
Dsui_3125	0	0	0	0	0	0	0	0	0	0	0	0	0	0	0	0	0	0	0	0	0	0	0	0	0	0	0	0	0	1	0	0	0	0	0
Dsui_3131	0	0	0	1	0	0	0	0	0	0	0	0	0	0	0	0	0	0	0	1	0	0	0	0	0	0	0	0	0	0	0	0	0	0	0
Dsui_3146	0	0	0	0	0	0	0	0	0	0	0	0	0	0	0	0	1	0	0	0	0	0	0	0	0	0	0	0	0	0	0	0	0	0	0
Dsui_3155	7	11	8	1	4	3	4	0	2	0	0	0	0	0	0	0	1	0	0	15	13	13	14	6	7	3	1	0	0	1	0	4	0	0	0
Dsui_3186	0	1	0	0	0	0	0	0	0	0	0	0	0	0	0	0	0	0	0	0	0	0	0	0	0	0	0	0	0	0	0	0	0	0	0
Dsui_3196	0	0	0	0	0	1	0	0	0	0	0	0	0	0	0	0	0	0	0	3	3	6	4	1	1	5	2	3	1	1	5	6	0	2	0
Dsui_3197	3	4	1	1	1	2	4	4	0	3	2	3	3	2	1	2	0	0	1	3	5	1	1	2	1	4	4	0	1	0	1	1	0	0	0
Dsui_3198	0	0	0	0	0	0	0	0	0	0	1	0	0	0	0	1	0	0	0	0	0	0	0	0	0	0	0	0	0	0	0	0	0	0	0
Dsui_3199	0	1	0	0	0	0	1	1	0	0	0	0	0	0	0	0	0	0	0	0	0	0	0	0	0	0	0	0	0	0	0	0	0	0	0
Dsui_3204	0	1	0	0	0	0	0	0	1	0	0	1	0	0	0	0	0	0	0	1	0	0	0	0	0	0	0	0	0	0	0	0	0	0	0
Dsui_3210	0	0	0	0	0	0	0	0	0	0	0	0	0	0	0	0	0	0	0	0	0	0	0	0	0	0	0	0	0	0	0	0	1	1	0
Dsui_3211	1	0	0	0	0	0	0	0	0	0	0	0	0	0	0	0	0	0	0	1	0	0	0	0	0	0	0	0	0	0	0	0	0	0	0
Dsui_3213	0	0	0	1	0	0	0	0	0	0	0	1	0	0	0	0	0	0	0	1	2	0	1	0	0	0	1	0	1	0	0	0	0	0	1
Dsui_3217	1	2	1	2	0	1	0	0	0	1	2	3	0	1	1	3	0	0	1	1	2	1	1	0	1	1	1	0	1	0	1	1	0	0	0
Dsui_3221	0	1	0	0	0	0	0	0	0	0	0	0	0	0	0	0	0	0	0	0	1	0	0	0	0	1	0	1	1	1	0	0	0	1	0
Dsui_3232	0	1	0	0	0	0	1	0	0	0	0	0	0	0	0	0	0	0	0	0	1	0	0	0	0	0	0	0	0	0	0	0	0	0	0
Dsui_3238	0	0	0	0	0	0	0	0	0	0	0	1	0	0	0	0	0	0	0	0	0	0	0	0	0	0	0	0	0	0	0	0	0	0	0
Dsui_3239	9	10	6	10	5	8	9	4	7	5	7	12	11	12	7	8	5	1	4	9	10	6	6	3	3	7	8	1	2	3	7	11	2	1	1
Dsui_3245	0	1	0	0	0	0	0	0	0	0	0	0	0	0	0	0	0	0	0	0	0	0	0	0	0	0	0	0	0	0	0	0	0	0	0
Dsui_3248	3	2	2	1	1	2	1	1	0	1	1	2	1	2	2	1	0	0	1	5	1	0	0	0	0	5	2	0	0	0	1	2	0	0	1
Dsui_3249	0	1	0	0	0	0	0	0	0	0	0	0	1	0	0	0	0	0	0	0	1	0	0	0	0	0	0	0	0	0	0	0	0	0	0
Dsui_3250	0	0	0	0	0	0	0	0	0	0	0	1	0	0	0	0	0	0	0	0	1	0	0	0	0	0	1	0	0	0	1	1	0	0	0
Dsui_3254	0	0	0	0	0	0	0	0	1	0	0	0	0	0	0	0	0	0	0	0	0	0	0	0	0	0	0	0	0	0	0	0	0	0	0
Dsui_3260	2	1	1	0	0	1	1	0	1	0	0	0	1	1	0	0	3	0	1	0	0	0	0	0	0	0	0	0	0	0	0	0	0	0	2
Dsui_3262	1	1	1	0	0	1	0	0	1	0	0	0	1	1	0	0	1	1	1	0	1	0	0	0	0	0	2	0	0	0	0	0	0	0	1
Dsui_3264	0	1	0	1	0	0	0	0	0	0	1	1	1	1	0	1	0	0	1	0	0	1	1	0	0	1	1	0	0	0	0	1	0	0	0
Dsui_3266	0	0	0	0	0	0	0	0	0	0	0	0	0	0	0	0	0	0	0	0	0	0	0	0	0	0	0	0	0	0	1	0	0	0	0
Dsui_3277	0	0	0	0	0	0	0	0	0	0	0	1	0	0	0	0	0	0	0	0	0	0	0	0	0	0	0	0	0	0	0	0	0	0	0
Dsui_3295	4	5	3	2	4	4	2	2	1	3	2	4	1	2	1	1	0	0	2	7	5	3	1	0	1	5	3	0	0	0	1	2	1	0	0
Dsui_3296	1	2	3	4	1	1	1	0	0	0	0	2	4	6	0	0	0	1	1	2	2	0	1	0	0	1	1	0	0	0	3	5	0	0	1
Dsui_3297	0	0	0	0	0	0	0	0	0	0	0	0	0	1	0	0	0	0	0	0	0	0	0	0	0	0	0	0	0	0	0	0	0	0	0
Dsui_3298	0	0	0	0	0	0	1	0	0	0	0	0	0	0	0	0	0	0	0	0	0	0	0	0	0	0	0	0	0	0	0	0	0	0	0
Dsui_3299	0	0	0	0	0	0	0	0	0	0	0	1	0	0	0	0	0	0	0	1	0	0	0	0	0	0	0	0	1	1	0	0	0	0	0
Dsui_3306	0	0	0	0	0	0	0	0	0	0	0	0	0	0	0	0	0	0	0	0	0	0	0	0	0	0	0	0	0	0	2	1	0	1	0
Dsui_3307	0	0	0	0	0	0	0	0	0	0	0	0	0	0	0	0	0	0	0	0	0	0	0	0	0	0	0	0	0	0	0	0	0	1	0
Dsui_3308	0	1	0	0	0	0	0	0	0	0	2	1	0	0	1	2	2	0	3	1	0	1	1	0	0	0	0	0	0	4	3	4	6	5	1
Dsui_3309	0	0	4	0	2	4	0	0	3	1	9	10	11	13	15	18	26	13	21	2	0	11	10	4	4	2	0	4	5	4	26	24	27	34	14
Dsui_3315	0	0	0	0	0	0	0	0	0	0	0	1	0	0	0	0	0	0	0	0	0	0	0	0	0	0	0	0	0	0	0	0	0	0	0
Dsui_3317	0	0	0	0	0	0	0	0	0	0	0	0	0	0	0	0	0	0	0	0	0	0	0	0	0	0	0	0	0	1	0	1	1	1	0
Dsui_3318	0	0	0	0	0	0	0	0	0	0	9	13	7	10	8	10	12	14	10	4	2	0	1	1	0	0	0	3	0	21	20	21	24	29	10
Dsui_3324	1	1	1	0	0	0	2	0	1	0	0	0	0	1	0	0	0	0	0	1	0	0	0	0	0	2	1	0	0	0	0	0	0	0	0
Dsui_3325	0	0	0	0	0	0	0	0	0	0	0	0	0	0	0	0	0	0	0	0	0	0	0	0	0	0	0	0	0	0	0	1	0	0	0
Dsui_3328	4	7	3	2	4	4	4	0	0	4	3	5	0	0	2	2	0	0	3	7	5	4	4	4	4	3	1	0	3	4	2	2	4	3	0
Dsui_3335	0	0	0	0	0	0	0	0	0	0	0	0	0	0	0	0	0	0	0	0	0	0	0	0	0	0	1	0	0	0	0	0	0	0	0
Dsui_3339	0	0	0	0	0	0	0	0	0	0	0	4	2	1	0	0	0	0	0	0	0	0	0	0	0	0	0	0	0	0	0	1	0	0	0
Dsui_3364	1	2	1	0	0	0	2	0	0	0	0	0	1	1	0	0	0	0	0	1	3	0	0	0	0	1	0	0	0	0	1	1	0	0	0
Dsui_3372	1	1	0	0	0	0	1	0	0	0	0	0	0	0	0	0	0	0	0	0	0	0	0	0	0	0	0	0	0	0	0	0	0	0	0
Dsui_3382	0	0	0	0	0	0	0	0	1	0	0	0	0	0	0	0	0	0	0	0	0	0	0	0	0	0	1	0	0	0	1	0	0	0	0
Dsui_3386	1	1	2	3	0	0	1	0	1	0	3	2	1	2	3	2	1	0	0	1	1	1	1	0	0	1	2	0	0	1	2	1	1	0	0
Dsui_3408	0	0	0	0	0	0	0	0	0	0	0	0	0	0	0	0	0	0	0	0	0	0	0	0	0	0	0	0	0	1	0	0	1	0	0
Dsui_3429	0	1	0	0	0	0	0	0	0	0	0	3	0	0	0	0	0	0	0	2	1	0	0	0	0	0	0	0	0	0	0	0	0	0	0
Dsui_3444	0	1	0	0	0	0	0	0	0	0	0	0	0	0	0	0	0	0	0	0	0	0	0	0	0	0	0	0	0	0	0	0	0	0	0
Dsui_3456	2	1	1	0	0	0	2	0	0	0	0	0	0	0	0	0	1	1	0	2	0	0	0	0	0	2	1	0	0	0	1	0	0	0	1
Dsui_3462	0	1	0	0	0	0	0	0	0	0	0	0	0	0	0	0	0	0	0	1	0	0	0	0	0	0	0	0	0	0	0	0	0	0	0
Dsui_3498	0	1	0	0	0	0	1	0	0	1	0	0	0	0	0	0	0	0	0	0	0	0	0	0	0	0	0	0	0	0	0	0	0	0	0
Dsui_3512	0	0	0	0	0	0	0	0	1	0	0	1	0	0	0	0	0	1	0	0	0	0	0	0	0	0	0	0	0	0	0	0	0	0	1
Dsui_3514	0	0	0	0	0	0	0	0	1	0	0	0	0	0	0	0	0	0	0	0	0	0	0	0	0	0	0	0	0	0	0	0	0	0	0
Dsui_3515	0	0	0	0	1	1	0	0	1	0	0	1	0	0	0	0	1	0	0	1	0	0	0	0	0	0	0	1	0	0	0	0	0	0	0
Dsui_3519	1	1	0	0	0	0	1	0	1	0	0	0	0	1	0	0	0	0	0	0	2	0	0	0	0	0	0	0	0	0	0	0	0	0	0
Dsui_3527	0	0	0	0	0	0	0	0	0	0	0	0	0	0	0	0	0	2	0	0	0	0	0	0	0	0	0	0	0	0	0	0	0	0	1
Dsui_3528	0	0	0	0	0	0	0	0	0	0	1	0	0	1	0	0	0	0	0	0	0	0	0	0	0	0	0	0	0	0	0	0	0	0	0
Dsui_3529	1	1	1	1	0	0	1	0	1	0	0	1	0	1	0	0	1	0	0	1	1	1	1	0	1	1	2	0	0	0	1	1	0	0	0
Dsui_3539	0	1	0	0	0	0	0	0	0	0	0	0	0	0	0	0	0	0	0	0	0	0	0	0	0	0	0	0	0	0	0	0	0	0	0
